# Supplementary material for: IRS1 Regulation by Wnt/β-Catenin Signaling and Varied Contribution of IRS1 to the Neoplastic Phenotype
Source: PubMed Central journal article supplement — J Biol Chem. 2009 Oct 20;285(3):1928–38. doi: 10.1074/jbc.M109.060319 (PMC2804351; doi:10.1074/jbc.m109.060319), 2009-10-20
Supplement: supp_M109.060319_jbc.M109.060319-2.pdf [file supp_M109.060319_jbc.M109.060319-2.pdf]

## Supplementary figure legends

*Supplementary Figure 1 : IRS1 expression in colorectal carcinomas.*

A Immunohistochemical staining for IRS1 was performed on tissue microarrays containing normal colonic mucosa and colorectal carcinomas. Representative samples for weakly, moderately and strongly staining colorectal carcinoma specimens, as well as moderately staining colorectal mucosa are shown.

B Analysis of IRS1 expression by IHC in colorectal carcinoma specimens scored in a semiquantitative scale of weak, moderate and strong.

*Supplementary Figure 2 : IRS1 knockdown reduces focus formation in RK3E*

A Representative images of methylene blue stained plates after focus formation assay in RK3E cell lines expressing control shRNA and two different shRNAs targeting the IRS1 transcript, upon transduction with recombinant retroviruses driving expression of LacZ, wildtype  $\beta$ -catenin and S33Y  $\beta$ -catenin.

*Supplementary Figure 3 : Genomic loci analyzed by chromatin immunoprecipitation.*

Predicted TCF binding sites are highlighted (CTTTGAT) or underlined (CWTTGWW). Mutations introduced into the downstream site 2 reporter construct are indicated in red.

A

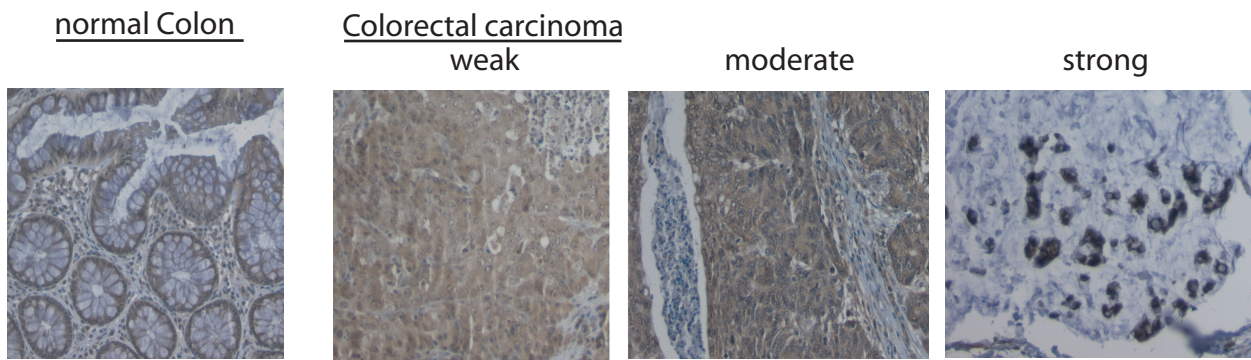

B

|                   | weak | moderate | strong |
|-------------------|------|----------|--------|
| colorectal cancer | 16   | 21       | 7      |
| normal mucosa     | 1    | 2        | 0      |

Bommer et al Supplementary figure 1:

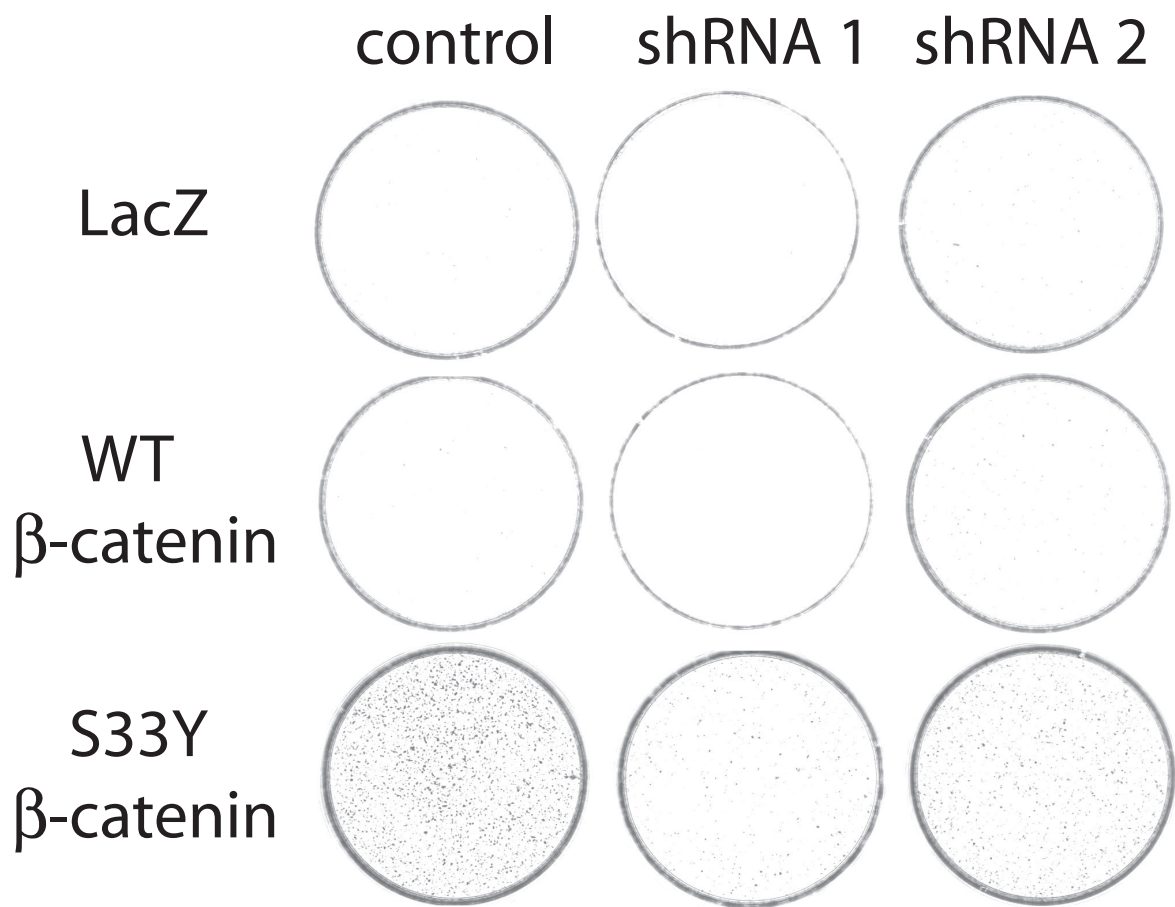

Bommer et al Supplementary Figure 2

### Supplementary figure 3

#### Genomic fragments encompassing the ChIP sites in the IRS1 locus

CTTTGAT sites are shaded and underlined

CWTTGWW sites are underlined

#### Intronic site

AGAATACCGTAGAGGTCTGTAGCTAATGACCTATGTAAGTCTAGCTGGACTATTTCTGGAAA  
**CTTTGAAAC**AAAGGCCATTGGCAGATATATATTCCTGTTTTTTTAGTATCAGTTTATAAAGGA  
ACATAAGGTTTTGTTTCAGGTTAGTTAATATTTAAACAATTAAAAACAACCTTTTTTGCAAAGA  
TTCATTTTGGTGAATAGGATGTATATATAGAAACAGCTGGGTTCTCTGTTTGAAACAACCTCT  
TCTGGGGCCCTTCACAGTCAACAAGTACAGACAGCCAAACTGATTATAAGGGAAGGTGTTG  
AAATATTACACATGAAACTCTAAATATATGGAGAAAACACATACATACACACTGGTATAAAA  
GAAGCCTCACTGTAATCTGTATGATCTAGCATGTCAGGAATTCTACTGCAAGAATTATACAA  
CAAGCTGAGACAATTTTCGGTGAGAGAGAAAGAAAA**ATCAATG**TCTGTGTTTTTAAAGAAA

#### downstream site 1

AAGCCATCTATTAAATTTGGTATCCCAGTAAGTGTTTTTATTAAATGTGAGTTGAGCTGCCT  
TTCACTTAACTCTACCATGAGCTTATTAAATTAATAAAAATTGTAAAGAAG**ATCAAAG**TTC  
CTTCTTTTAATTCCTTTAGATCCTTTGGGGAGACCACTGTTTATCTCTGTAAAGTTCAAGTC  
TGCGTAACTCTAAGTCAGCCAAATCTGACATCCAACCATGGAATCTTGCGGAGACCATTTCC  
TCCTCCTTTCTCAGTCTTCATATTCCCATTCCCTGCCAGACTACAGTTTGGAAGTTGTTGA  
ATGAATTCACAAGTACTACCATTTGCACTTTCACACACTGTTTAAAGGCAGAAGTATCAGAT  
TTCTCAGCACTGTGAAGAAGTTGGCAACTAC**TTCAAAG**CAATTTTGAAGCATCTATTACATT  
ATTAAGCAAGGGCAATAATGATCTACAAACTGCCAACCAGCTCATG

#### Downstream site 2

GGCCATATGCCAAGAATAACAGATTGAACTTTAACTCCAAGTCTGAAAAGTTTCCTTTTAC  
TGACTAGAGTTCAACCCAGTCTATTATCCTAACTAATGATAAAGCAATC**CTTTGAT**GCTG  
TC**CTTTGAA**CAAGTTGTGTAAGCTAAAACCTCAGTGAGAAAGAAAAAGCAGCATATAAAGGA  
AGCTTTTGGAGTTAGCAGCTATGCTAATTCCTAATTGCAGACATAGTACAAACATTTACACCC  
TTAAGGTTGCAATAACAAGACCCA

#### Mutant construct for site 2 :

GGCCATATGCCAAGAATAACAGATTGAACTTTAACTCCAAGTCTGAAAAGTTTCCTTTTAC  
TGACTAGAGTTCAACCCAGTCTATTATCCTAACTAATGATAAAGCAATC**CTGCGAT**GCTG  
TC**CTTTGAA**CAAGTTGTGTAAGCTAAAACCTCAGTGAGAAAGAAAAAGCAGCATATAAAGGA  
AGCTTTTGGAGTTAGCAGCTATGCTAATTCCTAATTGCAGACATAGTACAAACATTTACACCC  
TTAAGGTTGCAATAACAAGACCCA

#### Downstream site 3

TATGTAAGGAAAGAATCACAAAGTGCCTTTATCAAGCACCTGCAATTAACACACAGCCAACG  
TATATTGCAAAAGAGCATCTTTATTACAAGGATACAGATACTTATCTTTTAAATTTAGTAGT  
TATTCTAAACATACTTCCCTAACTGCCTGCATTCCAAATTCCAAACTGTATTG**CTTTGAT**CC  
ACTTAAAAGAGAAAGCATTCTACTCTGAATTAGAACAAGGAAACAGGACTGCAAAACAGCCT  
AGAGACTCCTGAGCATACTCTAGGAGAAATTTTAAAGCTTTTATTTTACCTGAAAATACTG  
ACAACAAAAGCCAATAACCTGCTGTATTACTGAGTAGTTACAATTATATAGAAAAACAATT  
TTTACATAATGATTTGGTAAATGTCATCAT**CTTTGTT**TATATTTTACTTTTCGCCCTATATTGT  
ACAAGGGCACTAAGTATTAATAAACCCAATCACAGACTTTCTTATTGTTAAATCATTCAATT

#### **Downstream site 4**

TGTGGCTATGACTTGGAATTATTGGTATCACTTAGTAAACACTGTTTGATCTAGCATTGCC  
TTCTCTCCCAATTA AAAATAGAGTCTGGCC**AACAATG**ACAGGTCCCCACCACCAGGTATTGG  
CCTCAGTCTGTTTCAGTGA AAAGCATTACAGCCTTCTAATTGGCATTCTCTTCAGAATTTGG  
CAAATTTGGTCAAAGCAGACCAGCACTATAGTAACCTTT**CATTATCAATG**CAAATCCTAACA  
GAAAAGCATTCCATTCTTCTTA**CATTGTA**CGTCATAAATGAAACACAATAAATTTTATTGTG  
AAACCTCCTAGGAAGACATTCCCTGAATAGACAAAGCAGAAAATGCTTGCA

#### **Downstream site 5**

AGCTTGTGATCTGAGGTGAACGACTTTATCTCCCTATTTCTGTCCTTTCTCAGCTATGAAAG  
ACCTAATACACTTCTAAAAGTGAACAGGCACACATCC**CTTTGATA**ACCTGTTCTCAGTTTTA  
GCTTGCCAGAAGTTTATACTTTATTTTTTTACTACAATTAATATCTTTTTCTTGTGGTAGTG  
GGAGGAGAAACATAATGATGTACATGCAAACCAAATATGCCAAAAGAATGCATGTATTTTC  
CCTCTGGAAGGAGTGCATGAAAGTTAGGCATGGTGAGTAACCCCGACTGATTA ACTCTACCA  
CTGATTAGAACACTGACTCACCATATGACTAACCACACATCAGATATTTATCTTGGGCCAAC  
CCTGGTTGACTCATAATCTATGGTTTAAAGATGAAGATCGGAGCTACTTTTGATCTTCTTCTT  
GCAAGCAT**TACAAAG**AAGATAATACCCTGTGTACTAGCAGAGCCAAC TTTACTGCCACAGAG
